# Supplementary material for: All India Ophthalmological Society - Preferred practice in refractive surgery during the COVID-19 pandemic
Source: PubMed Central journal article supplement — Indian J Ophthalmol. 2020 Jun 25;68(7):1263–8. doi: 10.4103/ijo.IJO_1754_20 (PMC7574139; doi:10.4103/ijo.ijo_1754_20), 2020-06-25
Supplement: IJO-68-1263_Suppl1.pdf [file IJO-68-1263_Suppl1.pdf]

## Supplementary Table 1: Declaration Form for COVID-19 Infection

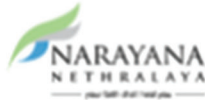

### Declaration/screening form for COVID-19 infection

Date: \_\_\_\_\_ Patient/Attender: \_\_\_\_\_  
 Name: \_\_\_\_\_ Age/Sex: \_\_\_\_\_ Contact no: \_\_\_\_\_  
 Address: \_\_\_\_\_ Email ID: \_\_\_\_\_

|                                |                                                                                   |     |    |
|--------------------------------|-----------------------------------------------------------------------------------|-----|----|
| 1                              | Do you have symptoms of Fever, Cough, Sneezing, Sore throat, Fatigue, Myalgia?    | Yes | No |
| 2                              | Do you have difficulty in breathing?                                              | Yes | No |
| 3                              | Have you travelled outside the country in past 30 days?                           | Yes | No |
| If yes, mention the countries. |                                                                                   |     |    |
| 4                              | Have you travelled inside India to other cities in past 30 days?                  | Yes | No |
| If yes, mention the cities.    |                                                                                   |     |    |
| 5                              | Exposure to a confirmed COVID-19 case OR to a suspicious patient in last 2 weeks? | Yes | No |
| 6                              | Have you visited a health care facility in the past two weeks?                    | Yes | No |

- The above information is true to the best of my knowledge. I understand that withholding/concealing the above information is unethical and illegal and against the interests of the global population fighting the COVID 19 pandemic.
- During the lockdown/post lockdown in the wake of the current COVID 19 pandemic, I have come to the hospital by myself voluntarily to avail Emergency Treatment/Treatment. If I am an asymptomatic carrier or an undiagnosed patient with COVID 19, I may endanger doctors and hospital staff, and therefore, it is my responsibility to take appropriate precautions and to follow the protocols prescribed by Government of India and other healthcare institutions.
- Despite all efforts taken by Hospital/Doctors/staff of Doctors to prevent COVID 19, which is explained to me, I understand that I may get an infection from the hospital or from a doctor, and I will take all precautions to prevent this from happening, and I will not hold doctors, the hospital or its hospital staff accountable if such an infection occurs to me or my accompanying persons.
- If I hide my facts and relevant details and because of my intentional or unintentional behavior or action OR if any healthcare personnel get infected, I will be held responsible and appropriate legal actions shall be taken against me.

|                             |
|-----------------------------|
| Verified by hospital staff: |
| Signature                   |
| Employee ID                 |

Sign/Thumb impression/Parent's or guardian's if a minor
